# Supplementary material
Source: MDPI journal article supplement (https://www.mdpi.com/2073-4352/8/5/201)

# checkCIF/PLATON report

You have not supplied any structure factors. As a result the full set of tests cannot be run.

THIS REPORT IS FOR GUIDANCE ONLY. IF USED AS PART OF A REVIEW PROCEDURE FOR PUBLICATION, IT SHOULD NOT REPLACE THE EXPERTISE OF AN EXPERIENCED CRYSTALLOGRAPHIC REFEREE.

No syntax errors found.      CIF dictionary      Interpreting this report

## Datablock: 180416h

---

Bond precision:    C-C = 0.0223 A

Wavelength=0.71073

Cell:                a=8.7871(7)                b=12.5399(11)                c=27.800(2)  
                      alpha=94.077(2)        beta=96.539(1)        gamma=103.400(3)  
Temperature:        298 K

|                        | Calculated                         | Reported            |
|------------------------|------------------------------------|---------------------|
| Volume                 | 2945.4(4)                          | 2945.4(4)           |
| Space group            | P -1                               | P-1                 |
| Hall group             | -P 1                               | ?                   |
| Moiety formula         | C54 H42 Cu4 N14 O10 [+<br>solvent] | ?                   |
| Sum formula            | C54 H42 Cu4 N14 O10 [+<br>solvent] | C54 H42 Cu4 N14 O10 |
| Mr                     | 1301.22                            | 1301.18             |
| Dx, g cm <sup>-3</sup> | 1.467                              | 1.467               |
| Z                      | 2                                  | 2                   |
| Mu (mm <sup>-1</sup> ) | 1.492                              | 1.492               |
| F000                   | 1320.0                             | 1320.0              |
| F000'                  | 1322.98                            |                     |
| h,k,lmax               | 10,14,33                           | 10,14,33            |
| Nref                   | 10397                              | 9998                |
| Tmin,Tmax              | 0.706,0.776                        | 0.547,0.786         |
| Tmin'                  | 0.498                              |                     |

Correction method= # Reported T Limits: Tmin=0.547 Tmax=0.786  
AbsCorr = MULTI-SCAN

Data completeness= 0.962

Theta(max)= 25.020

R(reflections)= 0.1091( 5017)

wR2(reflections)= 0.3205( 9998)

S = 0.968

Npar= 798

---

The following ALERTS were generated. Each ALERT has the format

**test-name\_ALERT\_alert-type\_alert-level.**

Click on the hyperlinks for more details of the test.

### Alert level B

|                                                                    |              |
|--------------------------------------------------------------------|--------------|
| PLAT341_ALERT_3_B Low Bond Precision on C-C Bonds .....            | 0.02227 Ang. |
| PLAT990_ALERT_1_B Deprecated .res/.hkl Input Style SQUEEZE Job ... | ! Note       |

### Alert level C

|                                                                    |              |
|--------------------------------------------------------------------|--------------|
| PLAT029_ALERT_3_C _diffrn_measured_fraction_theta_full value Low . | 0.962 Why?   |
| PLAT082_ALERT_2_C High R1 Value .....                              | 0.11 Report  |
| PLAT084_ALERT_3_C High wR2 Value (i.e. > 0.25) .....               | 0.32 Report  |
| PLAT232_ALERT_2_C Hirshfeld Test Diff (M-X) Cu3 --N9 .             | 5.1 s.u.     |
| PLAT234_ALERT_4_C Large Hirshfeld Difference Cu2 --N8              | 0.17 Ang.    |
| PLAT234_ALERT_4_C Large Hirshfeld Difference Cu4 --N12             | 0.16 Ang.    |
| PLAT234_ALERT_4_C Large Hirshfeld Difference O7 --N13              | 0.21 Ang.    |
| PLAT234_ALERT_4_C Large Hirshfeld Difference O8 --N13              | 0.25 Ang.    |
| PLAT242_ALERT_2_C Low 'MainMol' Ueq as Compared to Neighbors of    | O5 Check     |
| PLAT362_ALERT_2_C Short C(sp3)-C(sp2) Bond C2 - C3 .               | 1.37 Ang.    |
| PLAT362_ALERT_2_C Short C(sp3)-C(sp2) Bond C5 - C6 .               | 1.39 Ang.    |
| PLAT369_ALERT_2_C Long C(sp2)-C(sp2) Bond C37 - C42 .              | 1.54 Ang.    |
| PLAT420_ALERT_2_C D-H Without Acceptor N2 --H2B                    | Please Check |
| PLAT420_ALERT_2_C D-H Without Acceptor N4 --H4B                    | Please Check |

### Alert level G

|                                                                    |              |
|--------------------------------------------------------------------|--------------|
| PLAT004_ALERT_5_G Polymeric Structure Found with Maximum Dimension | 1 Info       |
| PLAT005_ALERT_5_G No Embedded Refinement Details Found in the CIF  | Please Do !  |
| PLAT007_ALERT_5_G Number of Unrefined Donor-H Atoms .....          | 4 Report     |
| PLAT072_ALERT_2_G SHELXL First Parameter in WGHT Unusually Large   | 0.19 Report  |
| PLAT093_ALERT_1_G No s.u.'s on H-positions, Refinement Reported as | mixed Check  |
| PLAT230_ALERT_2_G Hirshfeld Test Diff for O5 --N13 .               | 6.4 s.u.     |
| PLAT301_ALERT_3_G Main Residue Disorder .....(Resd 1 )             | 7% Note      |
| PLAT333_ALERT_2_G Large Aver C6-Ring C-C Dist. C10 -C17            | 1.43 Ang.    |
| PLAT333_ALERT_2_G Large Aver C6-Ring C-C Dist. C22 -C29            | 1.44 Ang.    |
| PLAT333_ALERT_2_G Large Aver C6-Ring C-C Dist. C34 -C41            | 1.47 Ang.    |
| PLAT335_ALERT_2_G Check Large C6 Ring C-C Range C22 -C29           | 0.17 Ang.    |
| PLAT335_ALERT_2_G Check Large C6 Ring C-C Range C34 -C41           | 0.22 Ang.    |
| PLAT335_ALERT_2_G Check Large C6 Ring C-C Range C46 -C53           | 0.16 Ang.    |
| PLAT380_ALERT_4_G Incorrectly? Oriented X(sp2)-Methyl Moiety ..... | C6 Check     |
| PLAT395_ALERT_2_G Deviating X-O-Y Angle From 120 for O7'           | 146.6 Degree |
| PLAT432_ALERT_2_G Short Inter X...Y Contact O9 ..C52               | 2.92 Ang.    |
| PLAT605_ALERT_4_G Largest Solvent Accessible VOID in the Structure | 207 A**3     |
| PLAT869_ALERT_4_G ALERTS Related to the Use of SQUEEZE Suppressed  | ! Info       |
| PLAT881_ALERT_1_G No Datum for _diffrn_reflns_av_R_equivalents ... | Please Do !  |
| PLAT899_ALERT_4_G SHELXL97 is Deprecated and Succeeded by SHELXL   | 2018 Note    |

- 
- 0 **ALERT level A** = Most likely a serious problem - resolve or explain  
 2 **ALERT level B** = A potentially serious problem, consider carefully  
 14 **ALERT level C** = Check. Ensure it is not caused by an omission or oversight  
 20 **ALERT level G** = General information/check it is not something unexpected
- 3 ALERT type 1 CIF construction/syntax error, inconsistent or missing data  
 18 ALERT type 2 Indicator that the structure model may be wrong or deficient  
 4 ALERT type 3 Indicator that the structure quality may be low  
 8 ALERT type 4 Improvement, methodology, query or suggestion  
 3 ALERT type 5 Informative message, check
-

---

It is advisable to attempt to resolve as many as possible of the alerts in all categories. Often the minor alerts point to easily fixed oversights, errors and omissions in your CIF or refinement strategy, so attention to these fine details can be worthwhile. In order to resolve some of the more serious problems it may be necessary to carry out additional measurements or structure refinements. However, the purpose of your study may justify the reported deviations and the more serious of these should normally be commented upon in the discussion or experimental section of a paper or in the "special\_details" fields of the CIF. checkCIF was carefully designed to identify outliers and unusual parameters, but every test has its limitations and alerts that are not important in a particular case may appear. Conversely, the absence of alerts does not guarantee there are no aspects of the results needing attention. It is up to the individual to critically assess their own results and, if necessary, seek expert advice.

### **Publication of your CIF in IUCr journals**

A basic structural check has been run on your CIF. These basic checks will be run on all CIFs submitted for publication in IUCr journals (*Acta Crystallographica*, *Journal of Applied Crystallography*, *Journal of Synchrotron Radiation*); however, if you intend to submit to *Acta Crystallographica Section C* or *E* or *IUCrData*, you should make sure that full publication checks are run on the final version of your CIF prior to submission.

### **Publication of your CIF in other journals**

Please refer to the *Notes for Authors* of the relevant journal for any special instructions relating to CIF submission.

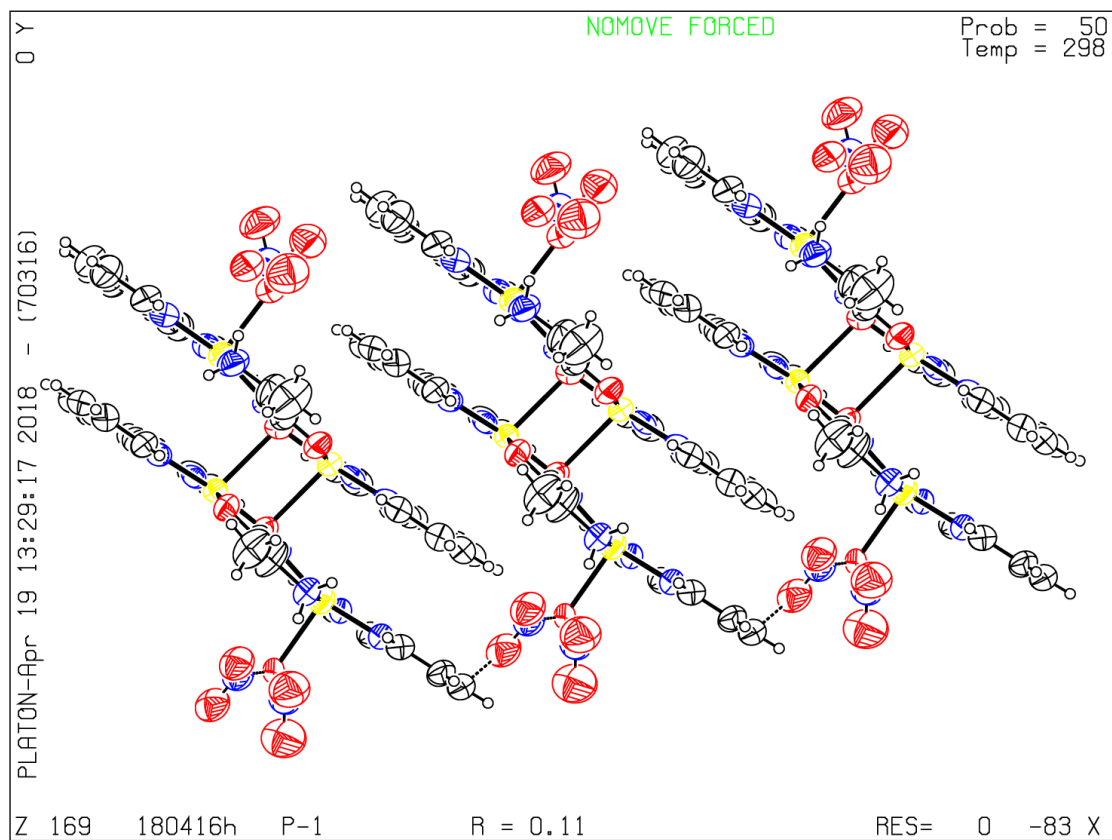

Supplement: s1 [file s1]
